# Supplementary material for: Impact of a Partial Solid Solution and Water Molecules on the Formation of Fibrous Crystals and Fluid Inclusions
Source: MDPI journal article supplement (doi:10.3390/cryst11101188), 2021-09-29
Supplement: s1 [file s1]

Archive with 2 entries (2 files):
- crystals-1391876-supplementary.pdf
- Film S1 - Hot stage microscopy from 20°C to 120°C at 1K-min.avi
